# Supplementary material for: A polymorph of the 6,13-dichloropentacene organic semiconductor: crystal structure, semiconductor measurements and band structure calculations
Source: Royal Society of Chemistry journal article supplement (doi:10.1039/c5ce00300h), 2015-01-01

## **A Polymorph of the 6,13-Dichloropentacene Organic semiconductor: Crystal Structure, Semiconductor Measurements and Band Structure Calculations**

Peggy V. Hatcher,<sup>a</sup> Joseph H. Reibenspies,<sup>b</sup> Robert C. Haddon,<sup>c</sup> Dawen Li,<sup>d</sup> Neoro Lopez,<sup>a</sup> Xiaoliu Chi<sup>a\*</sup>

<sup>a</sup>Department of Chemistry, Texas A&M University – Kingsville, Kingsville, TX 78363

<sup>b</sup>Department of Chemistry, Texas A&M University, College Station, TX 77842-3012

<sup>c</sup>Departments of Chemistry and Chemical & Environmental Engineering,  
University of California, Riverside, CA 92521

<sup>d</sup>Department of Electrical and Computer Engineering & Center for Materials for Information Technology, The University of Alabama  
Tuscaloosa, AL 35487

### **Supplementary Information**

All materials and solvents were obtained from Aldrich Chemical Co. (Milwaukee, WI) and were used without further purification unless otherwise noted. <sup>1</sup>H NMR was recorded on a Bruker Avance 300 Spectrometer (300-MHz) and the solvent was CDCl<sub>3</sub>. Mass Spectrum was obtained using Voyager STR matrix-assisted laser desorption time-of-flight mass spectrometer (MALDI-TOFMS) with DCTB as the matrix.

# $^1\text{H}$ NMR

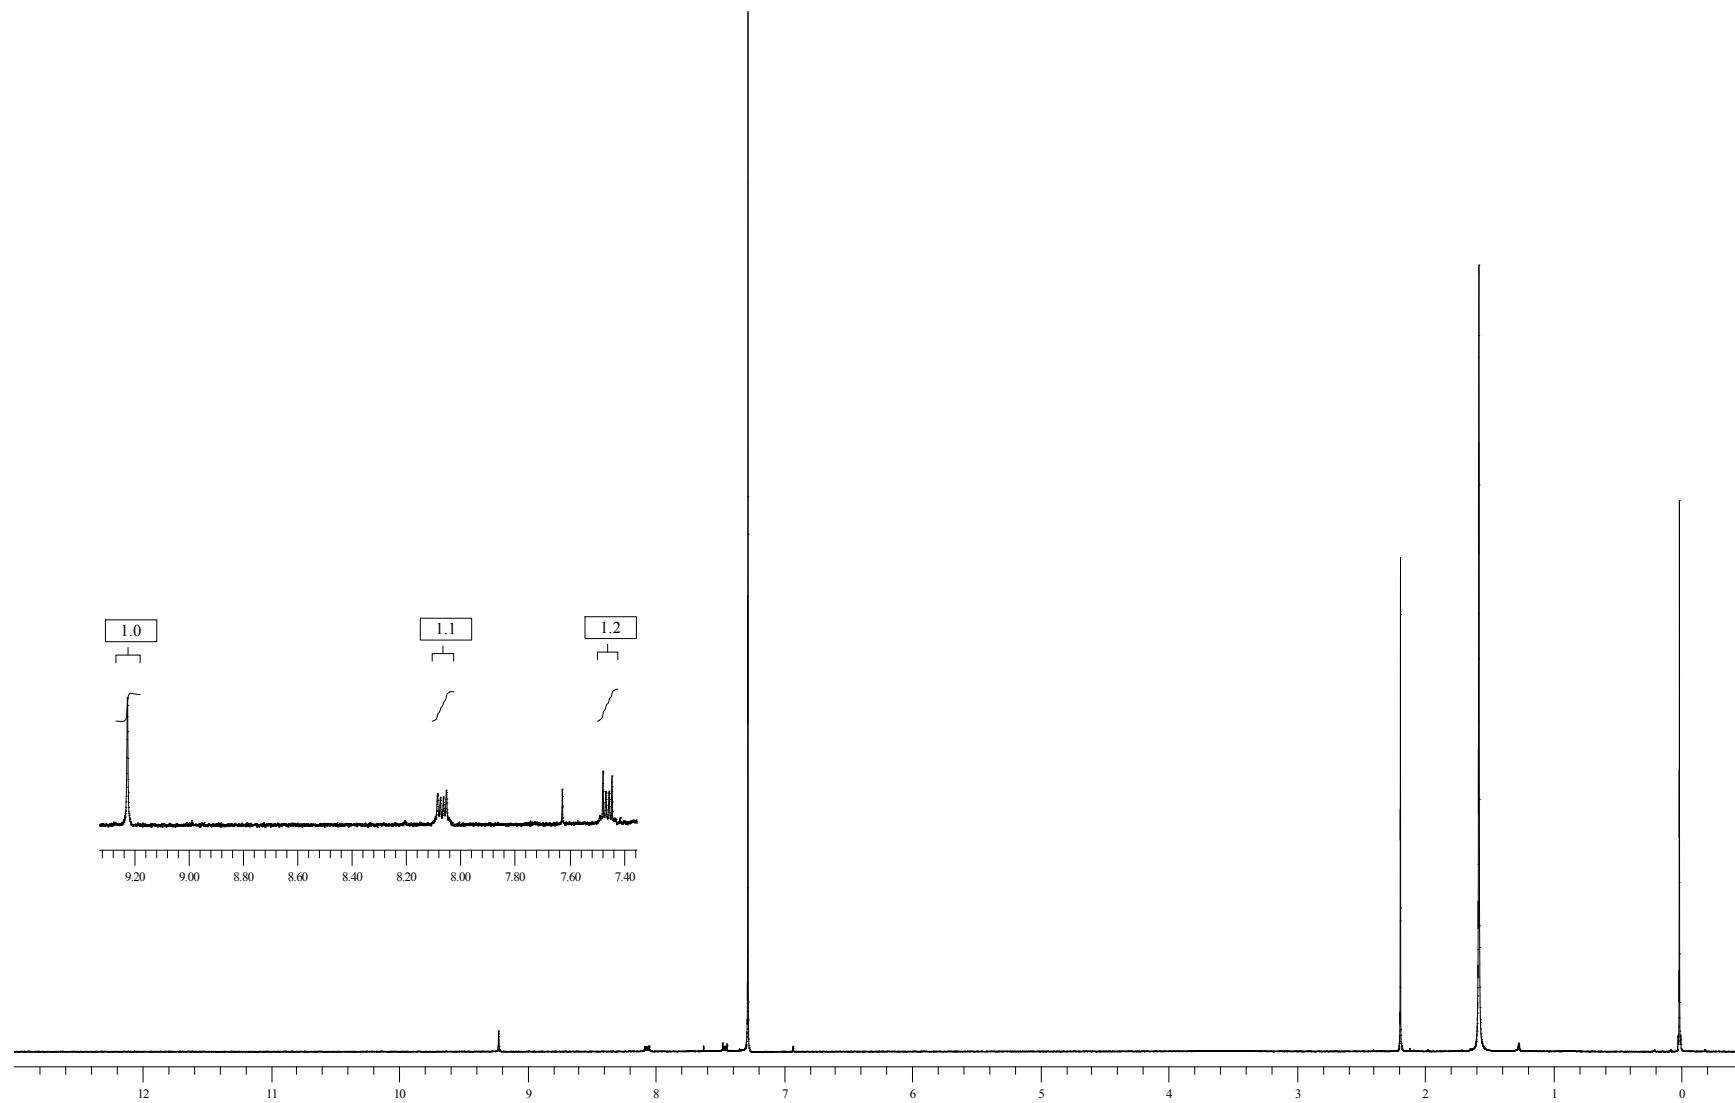

# Mass Spectrum

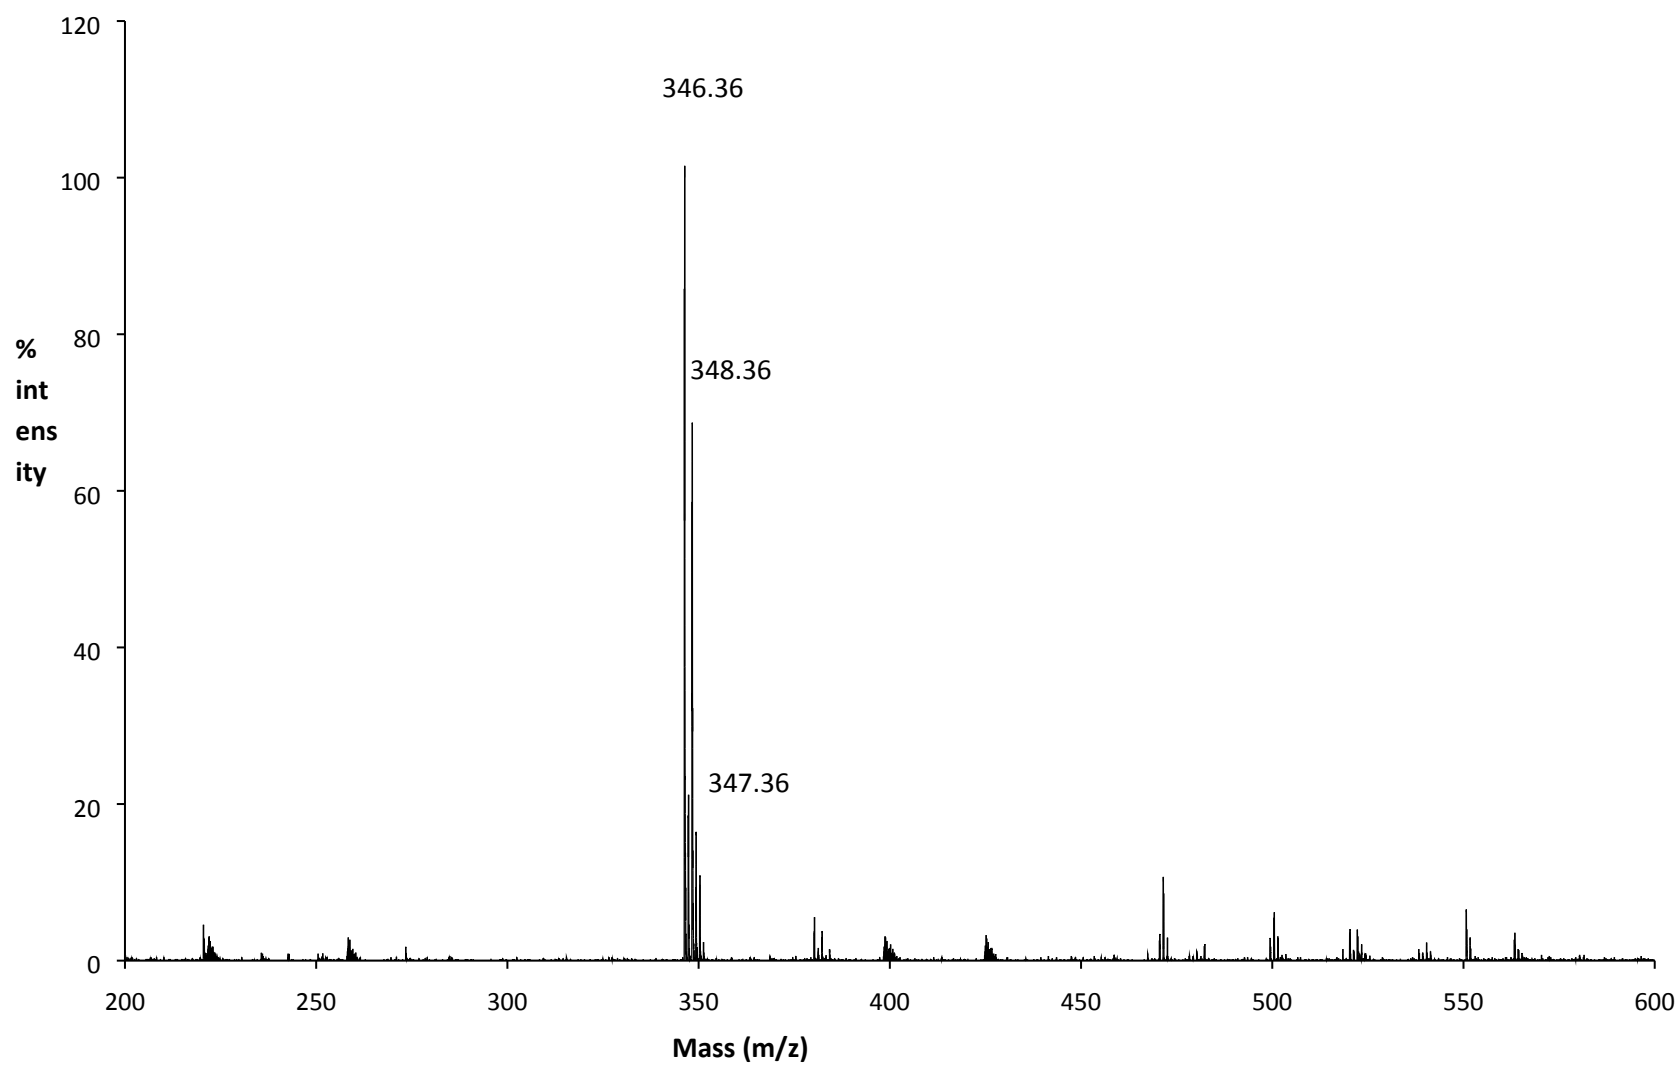

# X-Ray Powder Diffraction of VPT DCP

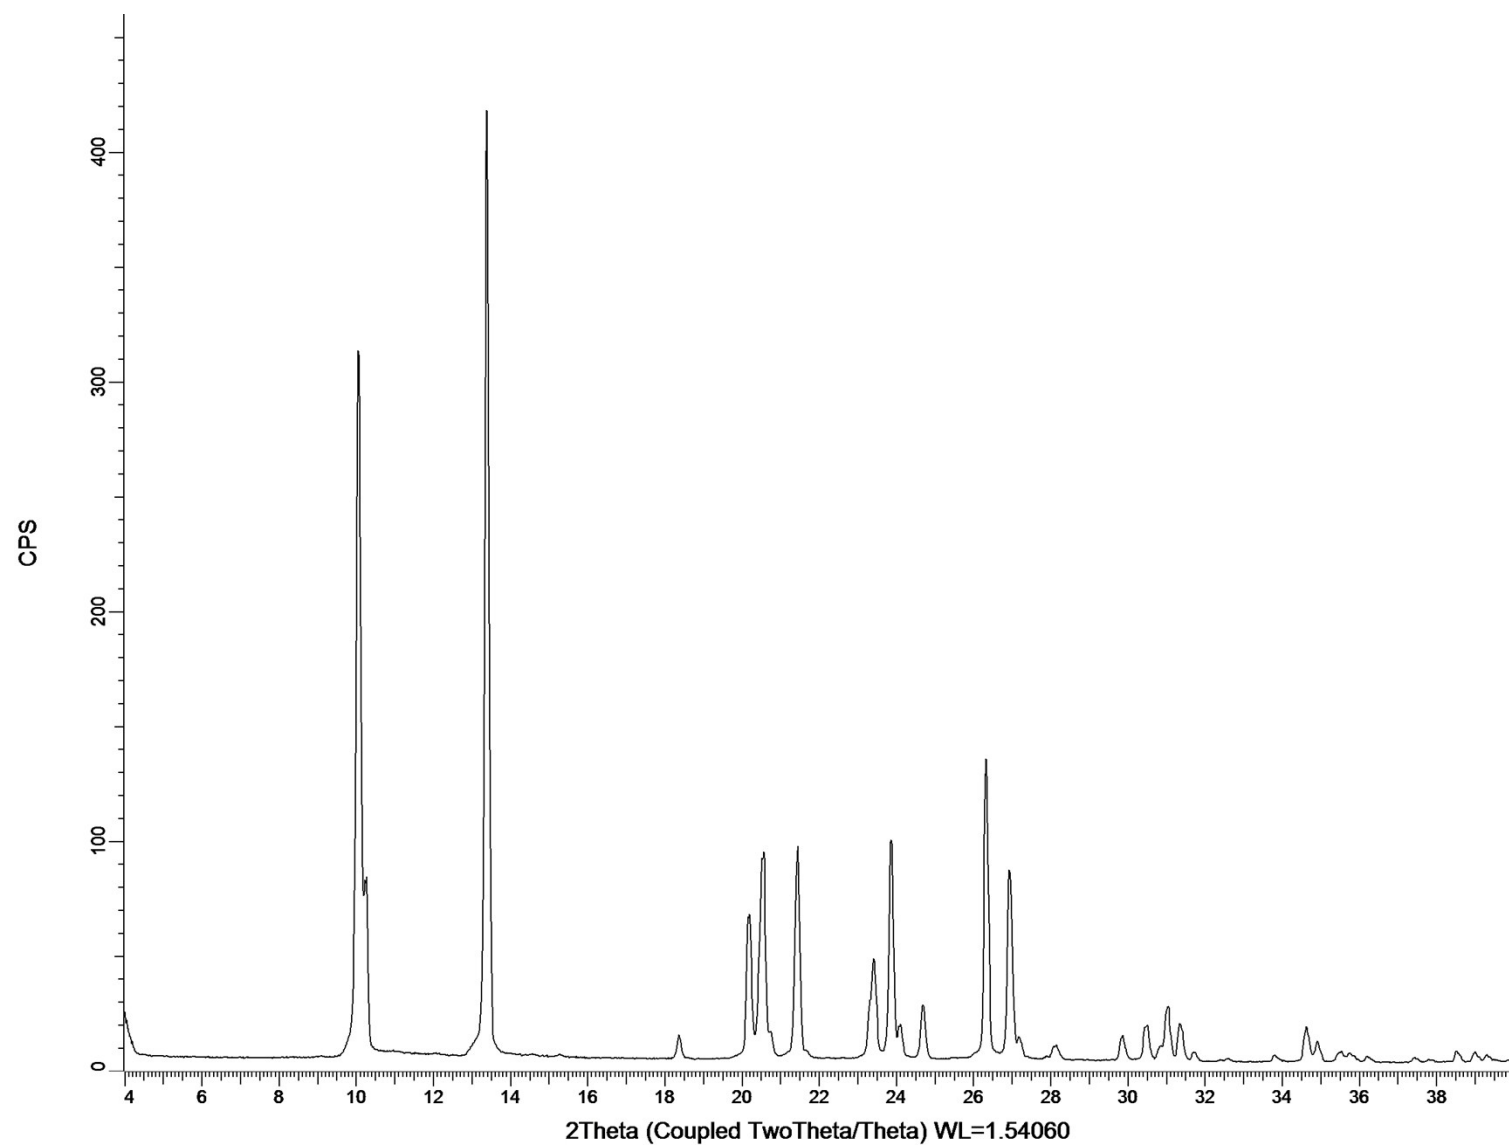

Supplement: c5ce00300h1.pdf [file c5ce00300h1.pdf]
